# Supplementary material for: Why Does Collaborative Filtering Work? Transaction-Based Recommendation Model Validation and Selection by Analyzing Bipartite Random Graphs
Source: Atypon-hosted journal article supplement (doi:10.1287/ijoc.1100.0385), 2010-04-16
Supplement: ijoc.1100.0385-sm-huang_and_zeng_-_joc-2008-07-oa-085.doc [file ijoc.1100.0385-sm-huang_and_zeng_-_joc-2008-07-oa-085.doc]

Online Supplement for

*Why Does Collaborative Filtering Work?*

*— Transaction-based Recommendation Model Validation and Selection by Analyzing Bipartite Random Graphs*

Zan Huang

Department of Supply Chain and Information Systems, Pennsylvania State University, University Park, PA, 16802, USA, zanhuang@psu.edu

Daniel Dajun Zeng

Department of Management Information Systems, University of Arizona; Institute of Automation, Chinese Academy of Sciences, Tucson, AZ, 85721, USA, zeng@eller.arizona.edu

**Network Topological Measures on “Small World,” “Clustering,” and “Scale-free” Phenomena**

Three major concepts related to such topological features are: “small world,” “clustering,” and “scale-free” phenomena (Albert and Barabási 2002, Newman, et al. 2001).

*Small World*: The small world concept describes the fact that despite their often large size, most networks exhibit a relatively short path between any two vertices. The distance between two vertices is defined as the number of edges along the shortest path connecting them. The *average path length* (or typical/characteristic distance) measure *L*, defined as the average of the path lengths of all connected vertex pairs, quantifies this property.

*Clustering*: Many real-world networks show an inherent tendency to cluster. A typical example is social networks, in which cliques form, representing circles of friends or acquaintances in which every member knows every other member. Such a tendency is quantified by the clustering coefficient measure (Newman, et al. 2001, Watts and Strogatz 1998). We adopt the Newman definition:

(1)

where a triangle is a set of three vertices each of which is connected to both of the others, and a connected triple is three vertices *x*-*y*-*z*, with both vertices *x* and *z* connected with *y* (note that *x*-*y*-*z* and *z*-*y*-*x* are considered the same connected triple). The factor 3 in the numerator accounts for the fact that each triangle contributes to three connected triples of vertices. The clustering coefficient *C* is strictly bounded between 0 and 1 and measures the extent to which being a neighbor is a transitive property. In our context, for example, a consumer graph represents relationships between consumers who purchase the same products. In a consumer graph with a high clustering coefficient (close to 1) such a co-purchase relationship tends to be transitive under most cases, i.e., if consumers *a* and *b* purchase the same products and consumers *b* and *c* purchase the same products, then consumers *a* and *c* are highly likely to do so as well.

*Scale-free*: The scale-free property is linked to the degree distribution of a graph. The *degree* of a vertex in a graph is the number of edges incident on that vertex. We define *p*(*k*), known as the degree distribution of the graph, to be the probability that a vertex chosen uniformly at random has degree *k* (i.e., the fraction of vertices that have degree *k*). Scale-free graphs refer to graphs with power-law degree distributions as described by (2):

(2)

where *α* is a positive constant. Power-law degree distributions have been observed in a wide range of networks, including many of the real networks mentioned previously.

Collaborative Filtering Algorithms

We first introduce a common notation for describing a collaborative filtering problem. The input of the problem is an *M* *N* *interaction matrix* *A* = (*aij*) associated with *M* consumers *C* = {*c*1*, c2,…, cM*} and *N* products *P* = {*p*1, *p*2, …, *pN*}. We focus on recommendation that is based on transactional data. That is, *aij* can take the value of either 0 or 1 with 1 representing an observed transaction between *ci* and *pj* (for example, *ci* has purchased *pj*) and 0 absence of transaction. We consider the output of a collaborative filtering algorithm to be *potential scores* of products for individual consumers that represent possibilities of future transactions. A ranked list of *K* products with the highest potential scores for a target consumer serves as the recommendations.

A naïve recommendation algorithm makes recommendation simply based on popularity of the products, i.e., recommending to each consumer the most popular products that are not purchased previously by this consumer. We refer to this algorithm as the *top-K most popular* algorithm. This naive algorithm has been used as a comparison benchmark in many previous recommendation algorithm evaluation studies. Many would not consider this algorithm as a recommendation algorithm as the recommendations are not customized at all for individual customers. Nevertheless, in some situations this naïve algorithm was reported to have achieved comparable or better performance than other more complex collaborative filtering algorithms (Huang, et al. 2007). Another baseline benchmark algorithm often used in recommendation algorithm evaluation studies is the *random* recommendation, which randomly selects *K* products not appearing the customer’s transaction history as the recommendation.

One basic collaborative filtering algorithm is the well-tested *user-based* neighborhood algorithm using statistical correlation (Breese, et al. 1998). To predict the potential interests of a given consumer, this algorithm first identifies a set of similar consumers based on correlation coefficients or similarity measures using the past transactions, and then makes a prediction based on the behavior of these similar consumers. The fundamental assumption is that consumers who have previously bought a large set of the same products will continue to buy the same set of new products in the future. Formally, the algorithm first computes a consumer similarity matrix *WC* = (*wc*st), *s*, *t* = 1, 2, …, *M.* The similarity score *wc*st is calculated based on the row vectors of *A* using a vector similarity function (such as in (Breese, et al. 1998)). A high similarity score *wc*st indicates that consumers *s* and *t* may have similar preferences since they have previously purchased a large set of common products. *WC∙A* gives potential scores of the products for each consumer.

The *item-based* algorithm (Deshpande and Karypis 2004) is different from the user-based algorithm only in that product similarities are computed instead of consumer similarities. The assumption here is that products that have been bought by the same set of consumers will continue to be co-purchased by other consumers. The user-based and item-based algorithms are the mostly commonly used CF algorithms. Formally, this algorithm first computes a product similarity matrix *WP* = (*wpst*), *s*, *t* = 1, 2, …, *N.* Here, the similarity score *wp*st is calculated based on column vectors of *A*. A high similarity score *wp*st indicates that products *s* and *t* are similar in the sense that they have been co-purchased by many consumers. *A∙WP* gives the potential scores of the products for each consumer.

Under the graphical representation, both the user-based and item-based algorithms rely on the paths of length 3 (involving 4 nodes, which we refer to as 4-node paths) to make recommendations: “target consumer – purchased product – similar consumer – unpurchased product” or “target consumer – purchased product – other consumer – similar product as the purchased ones.” Specifically, the “target consumer – purchased product – similar consumer” and “purchased product – other consumer – similar product” parts are the foundation for the construction of consumer and product similarity matrices, *WC* and *WP*. The more such length-2 paths between two consumers (products) the more similar they are. The concatenation of “– unpurchased product” and “target consumer –” to the length-2 paths corresponds to the matrix multiplication of *WC∙A* and *A∙WP* in the user-based and item-based algorithms that generate recommendations.

Many recent CF algorithms explore data patterns beyond 4-node paths (Aggarwal, et al. 1999, Huang, et al. 2004, Huang, et al. 2005, Huang, et al. 2007, Mirza, et al. 2003). The graph-based algorithms explicitly explore longer paths to exploit the transitive consumer-product associations. The fundamental assumption is that the behavior of the transitive neighbors (neighbors of the neighbors) is also informative in predicting the behavior of the consumer. We use the *spreading activation* algorithm in (Huang, et al. 2004) in this study. This algorithm starts with graph-based representation of the interaction matrix. Both the consumers and products are represented as nodes each with an activation level *j, j* = 1, …, *N*. To generate recommendations for consumer *c*, the corresponding node is set to have activation level 1 (*c* = 1). Activation levels of all other nodes are set at 0. After initialization the algorithm repeatedly performs the following activation procedure: *j*(*t* + 1) = , where *f*s is the continuous *SIGMOID* transformation function or other normalization functions; *tij* equals ** if *i* and *j* correspond to an observed transaction and 0 otherwise (0 < ** < 1). The algorithm stops when activation levels of all nodes converge. The final activation levels *j* of the product nodes give the potential scores of all products for consumer *c*. In essence this algorithm achieves efficient exploration of the *connectedness* of a consumer-product pair within the consumer-product graph context. The connectedness concept corresponds to the number of paths between the pair and their lengths and serves as the predictor of occurrence of future interaction.

Extension for Rating-based Recommendation

In this paper, we have focused on transaction-based recommendation where the input data is of unary nature with only positive observations (e.g., the presence of a sales transaction indicates positive utility of the product to the customer while absence of such a sales transaction may reveal that the utility is either negative or unknown). Transaction-based recommendation has wide applications as no explicit feedback from the customers is needed. Any sales operation that keeps track of the sales transaction data can apply transaction-based recommendation algorithms to see if future sales are predictable and to develop actionable strategies to take advantage of the predictions. On the other hand, rating-based recommendation such as the Netlifx movie recommendation represents a major portion of the existing recommender system research literature. The specific graph topological measures and model selection and validation framework presented in this paper are designed specifically for the transaction-based recommendation task. As the input unary interaction data for transaction-based recommendation is naturally represented by an undirected unweighted bipartite graph, the recommendation task in this context can be viewed as a task for predicting the occurrence of a future link in the graph. The follow-up graph topological measures and the notion of randomness of a graph developed in this paper are all based on this fundamental representation. Therefore the framework presented in this paper only applies for transaction-based recommendation algorithm selection and validation.

Although it is beyond the main focus of this paper, we provide some insights here on how to extend our general framework to deal with rating-based recommendation algorithms. For the rating-based recommendation tasks, we can still employ a bipartite graph to represent the input data. The difference is that the edges in the graph are now labeled by the specific value of the rating which carries information about positive and negative utility. The recommendation task is to predict the label of an unobserved edge. The topological measures on such a weighted bipartite graph should be defined differently to capture the data patterns exploited by specific collaborative filtering algorithms. For example, for the transaction-based recommendation case, we are interested in whether a four-node path *c*1–*p*1–*c*2–*p*2 tends to form a four-node cycle (measured by the 4-node clustering coefficient). For the rating-based recommendation case, we may assign the edge value by normalized rating values, , where *rij* is the rating customer *ci* gives product *pj*, is the mean rating for customer *ci*, and *si* is the standard deviation of ratings of customer *ci*. Within this graph, we are interested in the relationship between the products of edge values along the path *c*1–*p*1–*c*2–*p*2, *r*11*’r*21*’r*22*’*, and the value of edge *c*1–*p*2, *r*12*’*, for every 4-node cycle in the graph. Using the product is important here because the meaningful sign of preference is preserved. For example, a positive *r*11*’r*21*’r*22*’ may* be result of *c*1 and *c*2 both liking *p*1 and *c*2liking *p*2 or *c*1 and *c*2 both disliking *p*1 and *c*2 liking *p*2. Both situations may indicate *c*1 is likely to like *p*2 (positive *r*12*’*) if collaborative filtering works. Note that the standard user-based neighborhood CF algorithm (3) may be viewed as aggregating all edge value products of 4-node path connecting *ci* and *pj* to predict the edge value of *ci*–*pj* (4).

, = (3)

where *Pi,j* denotes the set of products both customers *ci* and *cj* have rated and denotes customer *c*’s overall average rating, and *C* denotes the set of neighbors considered for target customer *c*.

= (4)

where *Z* is a normalizing constant. An example measure can be defined based on |*r*12*’* – *r*11*’r*21*’r*22*’*| or *r*12*’*/*r*11*’r*21*’r*22*’* to reveal how one edge correlates with the product of three other edges within a 4-node cycle. Similarly other weighted bipartite graph topological measures can be defined for the recommendation algorithm selection and validation purpose. Significant further research efforts are needed to design these measures and evaluate their quality. With these measures, similar strategy can be adopted to generate random weighted bipartite graphs to compare with the actual graph observed to perform hypothesis testing. We note that there are considerable recent efforts (e.g., (Antoniou and Tsompa 2008, Barrat, et al. 2004)) to generalize graph topological measures for weighed graphs (mainly unipartite weighted graphs), which may serve as the foundation for developing specialized bipartite weighted graph measures for our purpose.

References

Aggarwal, C. C., J. L. Wolf, K.-L. Wu and P. S. Yu. 1999. Horting hatches an egg: A new graph-theoretic approach to collaborative filtering, *Proceedings of the Fifth ACM SIGKDD Conference on Knowledge Discovery and Data Mining (KDD'99)*, San Diego, CA 201-212.

Albert, R. and A.-L. Barabási. 2002. Statistical mechanics of complex networks, *Reviews of Modern Physics*, **74** 47-97.

Antoniou, I. E. and E. T. Tsompa. 2008. Statistical analysis of weighted networks, *Discrete Dynamics in Nature and Society*, **2008** Article ID 375452.

Barrat, A., M. Barthelemy, R. Pastor-Satorras and A. Vespignani. 2004. The architecture of complex weighted networks, *Proceedings of National Academy of Science*, **101**(11) 3747-3752.

Breese, J. S., D. Heckerman and C. Kadie. 1998. Empirical analysis of predictive algorithms for collaborative filtering, *Proceedings of the Fourteenth Conference on Uncertainty in Artificial Intelligence*, Madison, WI 43-52.

Deshpande, M. and G. Karypis. 2004. Item-based top-N recommendation algorithms, *ACM Transactions on Information Systems*, **22**(1) 143-177.

Huang, Z., H. Chen and D. Zeng. 2004. Applying associative retrieval techniques to alleviate the sparsity problem in collaborative filtering, *ACM Transactions on Information Systems (TOIS)*, **22**(1) 116-142.

Huang, Z., X. Li and H. Chen. 2005. Link prediction approach to collaborative filtering, *Proceedings of the 5th ACM/IEEE-CS joint conference on Digital libraries*, Denver, CO 141-142.

Huang, Z., D. Zeng and H. Chen. 2007. A comparative study of recommendation algorithms for e-commerce applications, *IEEE Intelligent Systems*, **22**(5) 68-78.

Mirza, B. J., B. J. Keller and N. Ramakrishnan. 2003. Studying Recommendation Algorithms by Graph Analysis, *Journal of Intelligent Information Systems*, **20**(2) 131-160.

Newman, M. E. J., S. H. Strogatz and D. J. Watts. 2001. Random graphs with arbitrary degree distributions and their applications, *Phys. Rev.*, **E 64** 026118.

Watts, D. J. and S. H. Strogatz. 1998. Collective dynamics of small-world networks, *Nature*, **393** 440-442.
